# Supplementary material
Source: PubMed Central journal article supplement (PMC3694775)
Supplement: NIHMS483327-supplement-Table_S10.pdf [file NIHMS483327-supplement-Table_S10.pdf]

**Table S10. The majority of genes bound by circadian transcriptional regulators (CTR), co-activators and RNAPII are expressed.** Only 1-5% of unexpressed genes are bound by CTRs. Cycling intron and cycling exon RNA rhythms are enriched for CTR occupancy. Non-cycling RNA genes are also bound by CTRs (this may be in part due to false negative scoring of cycling – i.e., the inability to detect cycling). Note the cycling and non-cycling classes do not include intermediate classes of weak cycling, and thus the sum total does not add up to 100%. From the UCSC canonical gene set of 28,661 genes, 13,197 genes are expressed at the RNA level, 15,464 genes are unexpressed, 1371 genes are intron cycling, 2037 genes are exon cycling, and 5839 genes are non-cycling.

| Name         | No. of Genes Bound | Bound Genes that are Expressed |     | Unexpressed Genes that are Bound |    | Cycling Intron RNA Genes Bound |     | Cycling Exon RNA Genes Bound |     | Non-Cycling Genes Bound |     |
|--------------|--------------------|--------------------------------|-----|----------------------------------|----|--------------------------------|-----|------------------------------|-----|-------------------------|-----|
|              |                    |                                |     |                                  |    |                                |     |                              |     |                         |     |
| BMAL1        | 3,175              | 2,824                          | 89% | 351                              | 2% | 442                            | 32% | 678                          | 33% | 1178                    | 20% |
| CLOCK        | 2,459              | 2,209                          | 90% | 250                              | 2% | 346                            | 25% | 557                          | 27% | 901                     | 15% |
| NPAS2        | 1,278              | 1,150                          | 90% | 128                              | 1% | 182                            | 13% | 329                          | 16% | 442                     | 8%  |
| PER1         | 2,585              | 2,298                          | 89% | 287                              | 2% | 340                            | 25% | 537                          | 26% | 975                     | 17% |
| PER2         | 3,833              | 3,367                          | 88% | 466                              | 3% | 475                            | 35% | 767                          | 38% | 1432                    | 25% |
| CRY1         | 6,384              | 5,592                          | 88% | 792                              | 5% | 758                            | 55% | 1212                         | 59% | 2456                    | 42% |
| CRY2         | 4,667              | 4,143                          | 89% | 524                              | 3% | 583                            | 43% | 944                          | 46% | 1794                    | 31% |
| CBP          | 5,097              | 4,534                          | 89% | 563                              | 4% | 584                            | 43% | 892                          | 44% | 2059                    | 35% |
| p300         | 673                | 619                            | 92% | 54                               | 0% | 118                            | 9%  | 173                          | 8%  | 232                     | 4%  |
| RNAPII-8WG16 | 4,794              | 4,478                          | 93% | 316                              | 2% | 648                            | 47% | 992                          | 49% | 2113                    | 36% |
| RNAPII-Ser5P | 7,533              | 6,927                          | 92% | 606                              | 4% | 908                            | 66% | 1431                         | 70% | 3373                    | 58% |
